# Supplementary material for: Altered splicing leads to reduced activation of CPEB3 in high-grade gliomas
Source: PubMed Central journal article supplement (PMC5173104; doi:10.18632/oncotarget.9735), 2016-05-31
Supplement: oncotarget-07-41898-s001.pdf [file oncotarget-07-41898-s001.pdf]

## Altered splicing leads to reduced activation of CPEB3 in high-grade gliomas

### Supplementary Materials

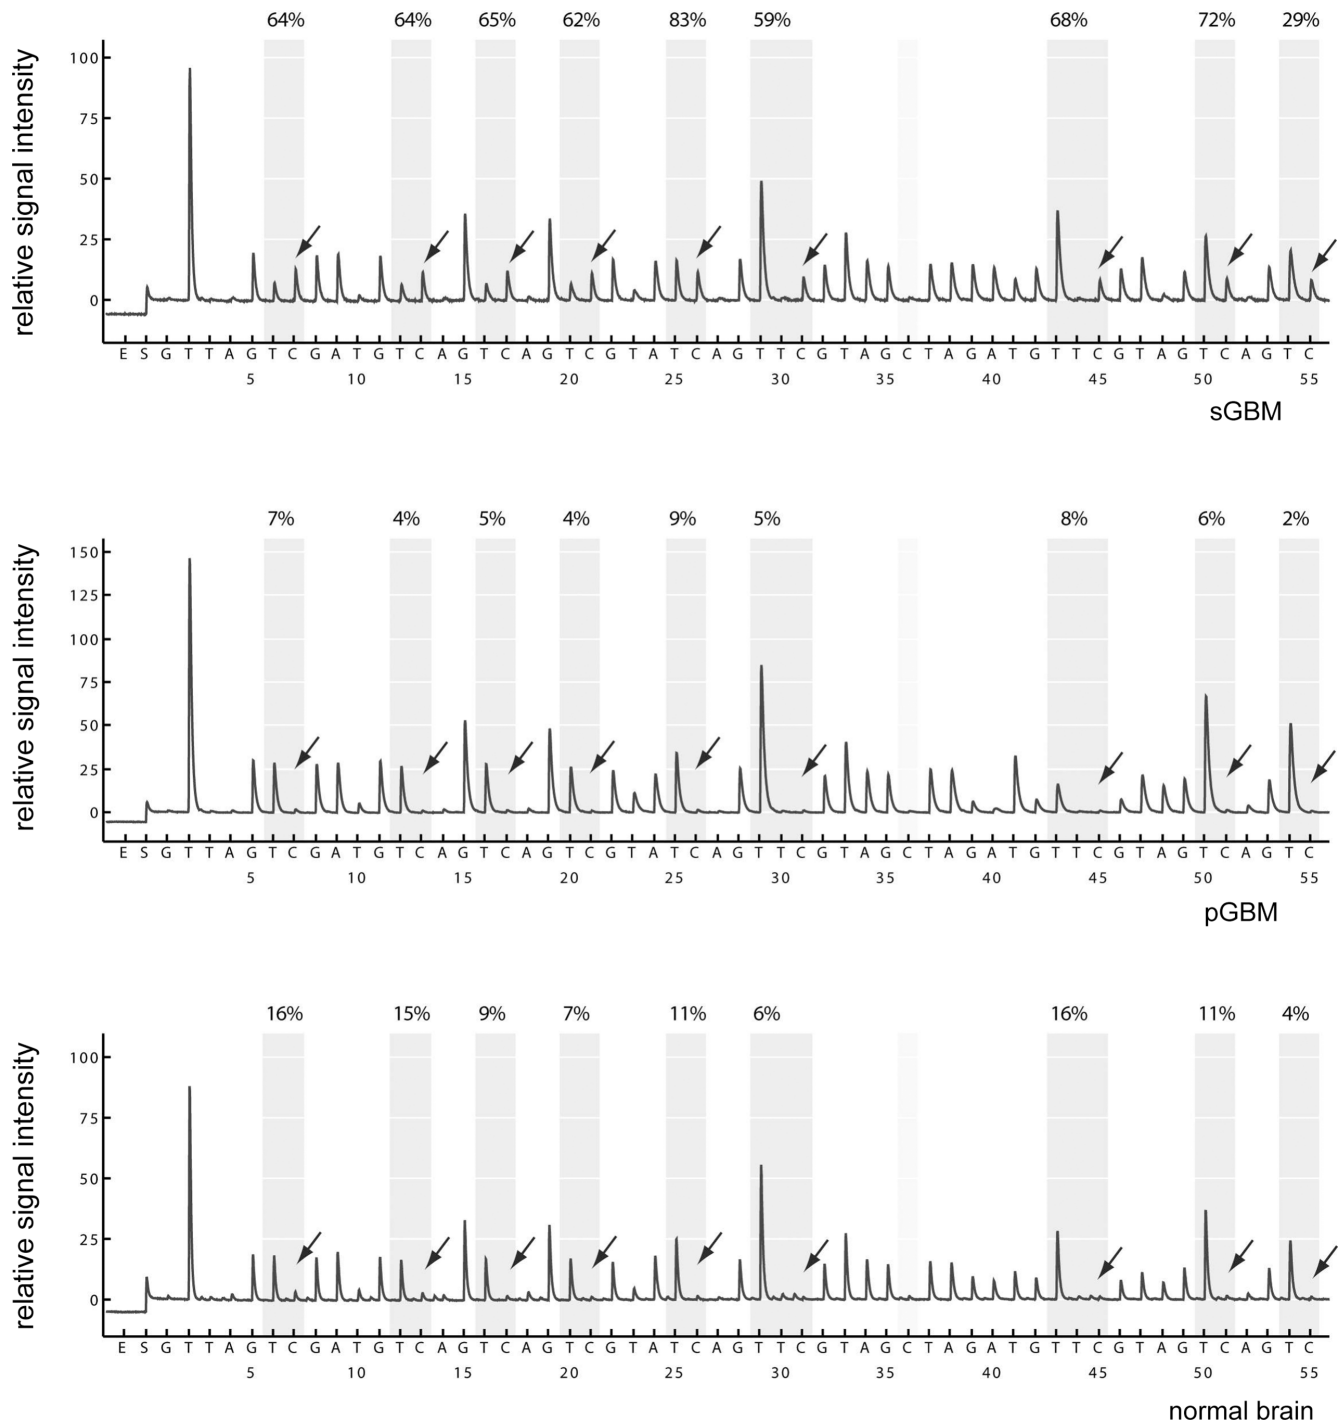

**Supplementary Figure S1: Pyrosequencing analysis of CpG islands in the 5'-region of CPEB1 gene in glioma and normal brain tissue.** The pyrogram of sGBM (top) showed strong methylation of up to 83% of the CpG positions. The pyrograms of a pGBM (middle) and normal brain tissue (bottom) showed methylation of the investigated region up to 16%.

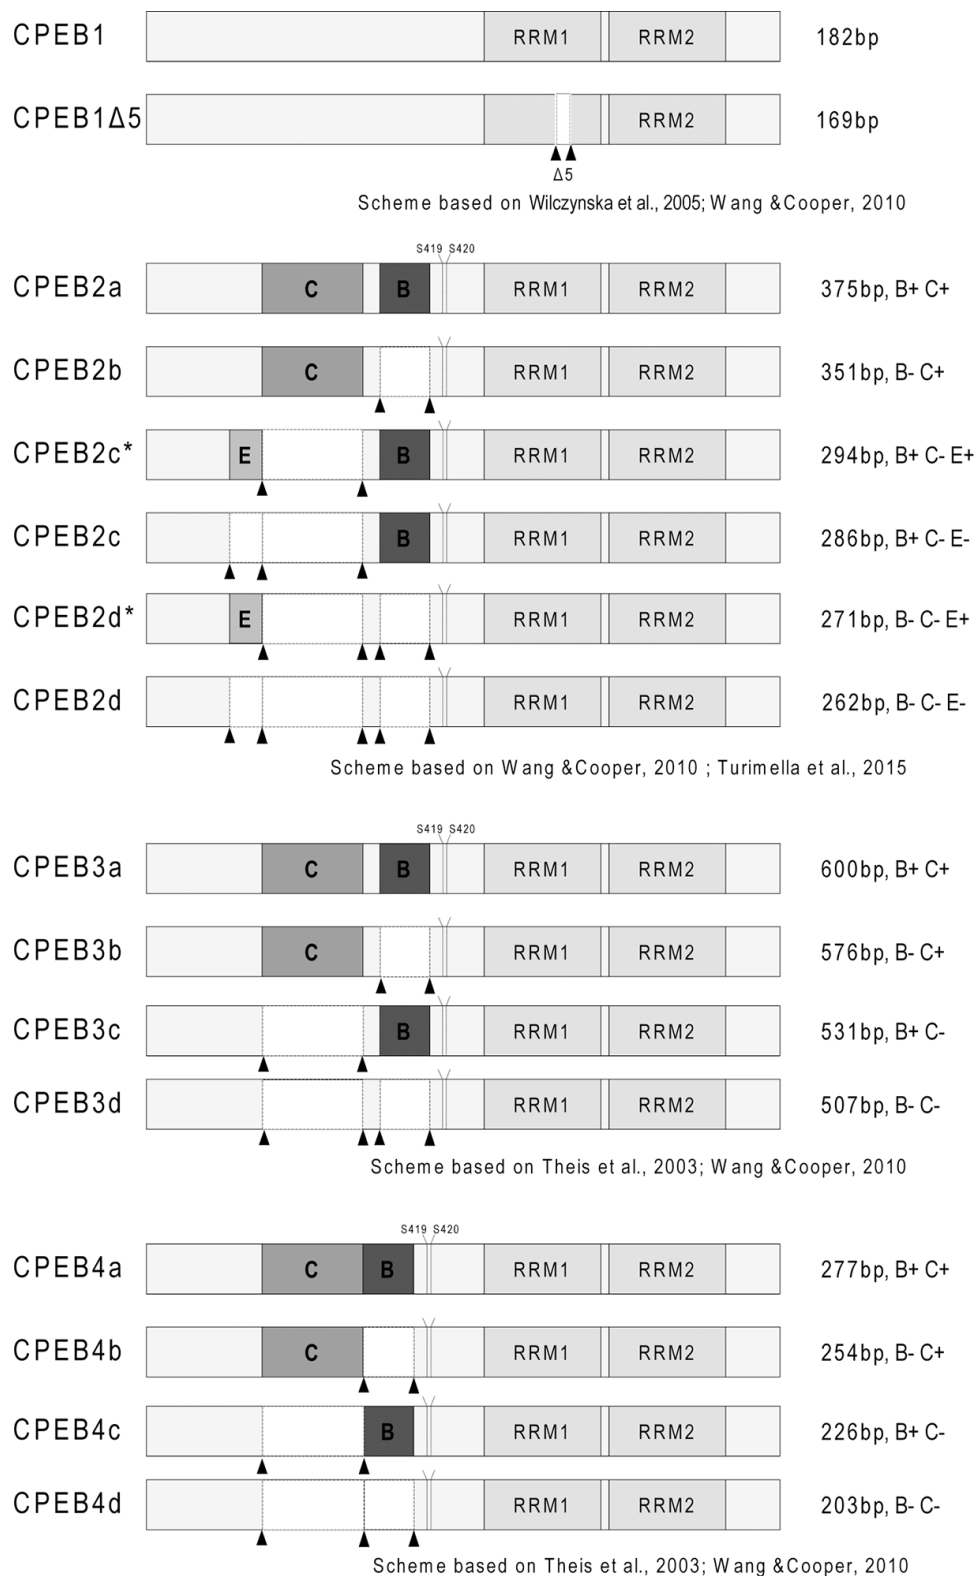

**Supplementary Figure S2: Scheme displaying alternative splice variants of CPEB1-4 detected by fragment analysis of human glioma samples.** Primers flanking the variable region resulted in 2 (CPEB1), 4 (CPEB3-4) and 6 (CPEB2) amplicons with varying sizes. The  $\Delta$ 5 deletion of CPEB1, full size isoforms of CPEB2-4 and alternations in the presence of B- C- E- regions of CPEB2-4 were labeled accordingly.

**Supplementary Table S1: Primers used for amplification of bisulfite treated DNA and primers used for pyrosequencing**

**Primers for amplification of bisulfite treated DNA:**

| <i>Gene</i> | <i>Sequence</i>                              |
|-------------|----------------------------------------------|
| CPEB1       | fw 5' GGGGGTTAGAGATTTAAGTTTGAG 3'            |
| CPEB1       | rev 5'-BIOTIN-ACTCCCATCCAAAAAACAATAATATCT 3' |
| CPEB2       | fw 5' GGGGGTTATTAGTTTAAGTGAGAGTG 3'          |
| CPEB2       | rev 5'-BIOTIN-TCCCCTACCCAAATTCCT 3'          |
| CPEB3       | fw 5'-BIOTIN-GGGGGTTATTAGTTTAAGTGAGAGTG 3'   |
| CPEB3       | rev 5' ACCACCAACCCATCATAAC 3'                |
| CPEB4       | fw 5' GGGGAAAAGAGAGAGAAAAGT 3'               |
| CPEB4       | rev 5'-BIOTIN-ACTTCCTCTCCCCATAA 3'           |

“fw” and “rev” mark forward and reverse primers.

**Primers for pyrosequencing:**

| <i>Gene</i> | <i>Sequence</i>               |
|-------------|-------------------------------|
| CPEB1       | ps 5'-AAGAGGGTAAGATTTATAAG-3' |
| CPEB2       | ps 5'-TGGGGGAGTGGGAGA-3'      |
| CPEB3       | ps 5'-CCAACCCATCATAACC-3'     |
| CPEB4       | ps 5'-GGTTTTAGTATTTTAG-3'     |

“ps” marks pyrosequencing primers.

**Supplementary Table S2: Evaluation of CPEB1-4 expression in glioma tissue**

| <i>Expression of CPEB1 in:</i>         | <i>no. of n.a. samples</i> | <i>no. of investigated samples</i> | <i>no. of negative samples</i> | <i>no. of positive samples</i> |                                   |                             |
|----------------------------------------|----------------------------|------------------------------------|--------------------------------|--------------------------------|-----------------------------------|-----------------------------|
|                                        |                            |                                    |                                | <i>intensity 1 (weak)</i>      | <i>intensity 2 (intermediate)</i> | <i>intensity 3 (strong)</i> |
| <i>low-grade astrocytoma (AII)</i>     | 3                          | 8                                  | 0                              | 3                              | 4                                 | 1                           |
| <i>anaplastic astrocytoma (AIII)</i>   | 1                          | 21                                 | 3                              | 8                              | 9                                 | 1                           |
| <i>secondary glioblastoma (sGBMIV)</i> | 1                          | 7                                  | 1                              | 4                              | 2                                 | 0                           |
| <i>primary glioblastoma (pGBMIV)</i>   | 3                          | 25                                 | 8                              | 12                             | 5                                 | 0                           |
| content as sum:                        | 8                          | 61                                 | 12                             | 27                             | 20                                | 2                           |
| content as percentage:                 |                            | 100%                               | 19.67%                         | 44.26%                         | 32.79%                            | 3.28%                       |

| <i>Expression of CPEB2 in:</i>         | <i>no. of n.a. samples</i> | <i>no. of investigated samples</i> | <i>no. of negative samples</i> | <i>no. of positive samples</i> |                                   |                             |
|----------------------------------------|----------------------------|------------------------------------|--------------------------------|--------------------------------|-----------------------------------|-----------------------------|
|                                        |                            |                                    |                                | <i>intensity 1 (weak)</i>      | <i>intensity 2 (intermediate)</i> | <i>intensity 3 (strong)</i> |
| <i>low-grade astrocytoma (AII)</i>     | 2                          | 9                                  | 1                              | 2                              | 2                                 | 4                           |
| <i>anaplastic astrocytoma (AIII)</i>   | 2                          | 20                                 | 2                              | 9                              | 4                                 | 5                           |
| <i>secondary glioblastoma (sGBMIV)</i> | 0                          | 8                                  | 1                              | 1                              | 4                                 | 2                           |
| <i>primary glioblastoma (pGBMIV)</i>   | 3                          | 25                                 | 7                              | 10                             | 6                                 | 2                           |
| content as sum:                        | 7                          | 62                                 | 11                             | 22                             | 16                                | 13                          |
| content as percentage:                 |                            | 100%                               | 17.74%                         | 35.48%                         | 25.81%                            | 20.97%                      |

| <i>Expression of CPEB3 in:</i>         | <i>no. of n.a. samples</i> | <i>no. of investigated samples</i> | <i>no. of negative samples</i> | <i>no. of positive samples</i> |                                   |                             |
|----------------------------------------|----------------------------|------------------------------------|--------------------------------|--------------------------------|-----------------------------------|-----------------------------|
|                                        |                            |                                    |                                | <i>intensity 1 (weak)</i>      | <i>intensity 2 (intermediate)</i> | <i>intensity 3 (strong)</i> |
| <i>low-grade astrocytoma (AII)</i>     | 1                          | 10                                 | 2                              | 3                              | 3                                 | 2                           |
| <i>anaplastic astrocytoma (AIII)</i>   | 2                          | 20                                 | 1                              | 8                              | 9                                 | 2                           |
| <i>secondary glioblastoma (sGBMIV)</i> | 1                          | 7                                  | 0                              | 0                              | 3                                 | 4                           |
| <i>primary glioblastoma (pGBMIV)</i>   | 4                          | 24                                 | 1                              | 6                              | 12                                | 5                           |
| content as sum:                        | 8                          | <b>61</b>                          | <b>4</b>                       | <b>17</b>                      | <b>27</b>                         | <b>13</b>                   |
| content as percentage:                 |                            | <b>100%</b>                        | <b>6.56%</b>                   | <b>27.87%</b>                  | <b>44.26%</b>                     | <b>21.31%</b>               |

| <i>Expression of phospho-CPEB3 in:</i> | <i>no. of n.a. samples</i> | <i>no. of investigated samples</i> | <i>no. of negative samples</i> | <i>no. of positive samples</i> |                                   |                             |
|----------------------------------------|----------------------------|------------------------------------|--------------------------------|--------------------------------|-----------------------------------|-----------------------------|
|                                        |                            |                                    |                                | <i>intensity 1 (weak)</i>      | <i>intensity 2 (intermediate)</i> | <i>intensity 3 (strong)</i> |
| <i>low-grade astrocytoma (AII)</i>     | 3                          | 8                                  | 1                              | 2                              | 3                                 | 2                           |
| <i>anaplastic astrocytoma (AIII)</i>   | 2                          | 20                                 | 3                              | 10                             | 6                                 | 1                           |
| <i>secondary glioblastoma (sGBMIV)</i> | 0                          | 8                                  | 1                              | 7                              | 0                                 | 0                           |
| <i>primary glioblastoma (pGBMIV)</i>   | 2                          | 26                                 | 16                             | 10                             | 0                                 | 0                           |
| content as sum:                        | 7                          | <b>62</b>                          | <b>21</b>                      | <b>29</b>                      | <b>9</b>                          | <b>3</b>                    |
| content as percentage:                 |                            | <b>100%</b>                        | <b>33.87%</b>                  | <b>46.77%</b>                  | <b>14.52%</b>                     | <b>4.84%</b>                |

| <i>Expression of CPEB4 in:</i>         | <i>no. of n.a. samples</i> | <i>no. of investigated samples</i> | <i>no. of negative samples</i> | <i>no. of positive samples</i> |                                   |                             |
|----------------------------------------|----------------------------|------------------------------------|--------------------------------|--------------------------------|-----------------------------------|-----------------------------|
|                                        |                            |                                    |                                | <i>intensity 1 (weak)</i>      | <i>intensity 2 (intermediate)</i> | <i>intensity 3 (strong)</i> |
| <i>low-grade astrocytoma (AII)</i>     | 1                          | 10                                 | 0                              | 6                              | 3                                 | 1                           |
| <i>anaplastic astrocytoma (AIII)</i>   | 2                          | 20                                 | 0                              | 12                             | 5                                 | 3                           |
| <i>secondary glioblastoma (sGBMIV)</i> | 1                          | 7                                  | 1                              | 1                              | 4                                 | 1                           |
| <i>primary glioblastoma (pGBMIV)</i>   | 3                          | 25                                 | 4                              | 11                             | 5                                 | 5                           |
| content as sum:                        | 7                          | <b>62</b>                          | <b>5</b>                       | <b>30</b>                      | <b>17</b>                         | <b>10</b>                   |
| content as percentage:                 |                            | <b>100%</b>                        | <b>8.06%</b>                   | <b>48.39%</b>                  | <b>27.42%</b>                     | <b>16.13%</b>               |

Investigated tissues were classified as being positive or negative for the respective antibody. Immunoreactivity was subdivided into three intensity groups: 1-weak, 2-intermediate and 3-strong n.a. labels not accessible samples.

### Supplementary Table S3: Primers and probes used for semi quantitative real-time PCR

| <i>Gene</i> | <i>Sequence</i>                     | <i>Position</i>                        | <i>Product length</i> | <i>GeneBank accession no.</i> |
|-------------|-------------------------------------|----------------------------------------|-----------------------|-------------------------------|
| CPEB1       | fw 5' GCACCCAGGACTCAGATTCC 3'       | 335(v1), 110 (v2)                      | 73 bp (v1),           | NM_030594                     |
| CPEB1       | rev 5' CCCAGTGGGTTATGGAGCAT 3'      | 388 (v1), 163 (v2)                     | 73 bp (v2)            |                               |
| CPEB1       | pb 5' CCCAGAGCAGCACACACTCGGTACTG 3' | 358 (v1), 134 (v2)                     |                       |                               |
| PBGD        | fw 5' GCTATGAAGGATGGGCAACT 3'       | 808 (v1), 756 (v2), 688 (v3), 637 (v4) | 149 bp (v1-v4)        | NM_000190                     |
| PBGD        | rev 5' GTGATGCCTACCAACTGTGG 3'      | 936 (v1), 886 (v2), 817 (v3), 766 (v4) |                       |                               |
| PBGD        | pb 5' TGCCCAGCATGAAGATGGCC 3'       | 906 (v1), 855 (v2), 786 (v3), 735 (v4) |                       |                               |

“fw” and “rev” mark forward and reverse primers, “pb” probe and “v” transcript variant.

**Supplementary Table S4: Primers used for reverse transcription and identification of alternative CPEB1-4 splice isoforms**

| <i>Gene</i> | <i>Sequence</i>                              | <i>Position</i>           | <i>Predicted product length</i> | <i>GeneBank accession no.</i> | <i>Detected product length</i> | <i>Isoform</i>   |
|-------------|----------------------------------------------|---------------------------|---------------------------------|-------------------------------|--------------------------------|------------------|
| CPEB1       | fw 5' GGATTGGTTAACACCTTCCGTG<br>TTTTTGGC 3'  | 967 (v1),<br>751 (v2)     | 176 bp (v1)                     | NM_030594                     |                                |                  |
| CPEB1       | rev 5' AGGCCATCTGGGCTCAGCGGG 3'              | 1131<br>(v1),<br>921 (v2) | 191 bp (v2)                     | NM_001079533                  | 169 bp<br>182 bp               | CPEB1Δ5<br>CPEB1 |
| CPEB2       | fw 5' AACTCCATCACTGACTCCAAAATCT<br>3'        | 1860                      |                                 |                               |                                |                  |
| CPEB2       | rev 5' CAAGCCATCATCTATTGGAA<br>AGAGGGAAGA 3' | 2206                      | 375 bp (v4)                     | NM_001177382                  | 375 bp                         | CPEB2a           |
|             |                                              | 2182                      | 352 bp (v2)                     | NM_182485                     | 351 bp                         | CPEB2b           |
|             |                                              | 2125                      | 295 bp (v3)                     | NM_001177381                  | 294 bp                         | CPEB2 c*         |
|             |                                              | 2116                      | 286 bp (v5)                     | NM_001177383                  | 286 bp                         | CPEB2c           |
|             |                                              | 2101                      | 271 bp (v6)                     | NM_001177384                  | 271 bp                         | CPEB2d*          |
|             |                                              | 2092                      | 262 bp (v1)                     | NM_182646                     | 262 bp                         | CPEB2d           |
| CPEB3       | fw 5' CAAAAAGCCCTTCTCCAGCAAC 3'              | 876                       |                                 |                               |                                |                  |
| CPEB3       | rev 5' TTCAGCTTTGTGAGGCCAGTCTA 3'            | 14578                     | 604 bp (v1)                     | XM_006717715                  | 600 bp                         | CPEB3a           |
|             |                                              | 1433                      | 580 bp (v3)                     | XM_011539514                  | 576 bp                         | CPEB3b           |
|             |                                              | 1388                      | 535 bp                          | *                             | 531 bp                         | CPEB3c           |
|             |                                              | 1364                      | 511 bp                          | *                             | 507 bp                         | CPEB3d           |
| CPEB4       | fw 5' CAGCTCTGCCTTTGCACCTAAAT 3'             | 1053                      |                                 |                               |                                |                  |
| CPEB4       | rev 5' GGCCATCATCCAAGAATCCATC 3'             | 1309                      | 278 bp (v1)                     | NM_30627                      | 277bp                          | CPEB4a           |
|             |                                              | 1286                      | 255 bp                          | *                             | 254bp                          | CPEB4b           |
|             |                                              | 1258                      | 227 bp (v2)                     | NM_001308189                  | 226bp                          | CPEB4c           |
|             |                                              | 1234                      | 203 bp (v3)                     | NM_001308191                  | 203bp                          | CPEB4d           |

\*constructed based on a transcript variant alignment,  
The isoforms of CPEB2 were described according to Turimella et al., 2015.

**Supplementary Table S5: RT-PCR products (relative fluorescent units) of splice variants of the CPEB 1-4 genes**

**A**

The RT-PCR products of specific splice isoforms of the *CPEB1* gene:

| Detected alternative splice isoforms: |             | $\Delta 5$ |        |        |        |
|---------------------------------------|-------------|------------|--------|--------|--------|
| Diagnose                              | ID/T-Nummer | 169 bp     | 182 bp | 508 bp | 599 bp |
| AAIII                                 | 2377        | 26683      |        |        |        |
| AAIII                                 | 2526        | 30894      |        |        |        |
| AAIII                                 | 2725        | 21376      |        |        |        |
| AAIII                                 | 2744        | 23806      |        |        |        |
| AAIII                                 | 2771        | 31813      |        |        |        |
| AAIII                                 | 2897        | 37449      |        |        |        |
| AAIII                                 | 2899        | 24278      |        |        |        |
| AAIII                                 | 3423        | 54168      |        |        |        |
| AAIII                                 | 3545        | 28195      |        |        |        |
| AAIII                                 | 3546        | 45194      |        |        |        |
| AAIII                                 | 3548        | 34216      |        |        |        |
| AAIII                                 | 4045        | 32681      |        |        |        |
| GBM                                   | 71          | 38072      |        |        |        |
| GBM                                   | 72          | 32832      |        |        |        |
| GBM                                   | 132         | 27337      |        |        |        |
| GBM                                   | 172         | 21483      |        |        |        |
| GBM                                   | 327         | 7186       |        |        |        |
| GBM                                   | 328         | 25658      |        |        |        |
| GBM                                   | 625         | 27745      |        |        |        |
| GBM                                   | 862         | 19256      |        |        |        |
| GBM                                   | 1010        | 25856      |        |        |        |
| GBM                                   | 1311        | 30762      |        |        |        |
| GBM                                   | 1619        | 20905      |        |        |        |
| GBM                                   | 1968        | 26145      |        |        |        |
| GBM                                   | 2010        | 34031      |        |        |        |
| GBM                                   | 2104        | 23173      |        |        |        |
| GBM                                   | 2169        | 18711      |        |        |        |
| GBM                                   | 2304        | 25799      |        |        |        |
| GBM                                   | 2481        | 27551      |        |        |        |
| GBM                                   | 2486        | 26420      |        |        |        |
| GBM                                   | 2494        | 30091      |        |        |        |
| GBM                                   | 2735        | 43101      |        |        |        |
| GBM                                   | 2757        | 20864      |        |        |        |
| GBM                                   | 2854        | 30034      |        |        |        |
| GBM                                   | 2884        | 21244      |        |        |        |
| GBM                                   | 2896        | 19339      |        |        |        |
| GBM                                   | 3007        | 52052      |        |        |        |
| GBM                                   | 3031        | 37154      |        |        |        |
| GBM                                   | 3032        | 26770      |        |        |        |
| GBM                                   | 3066        | 7859       |        |        |        |

|                     |                  |              |             |             |             |
|---------------------|------------------|--------------|-------------|-------------|-------------|
| GBM                 | 3070             | 16581        | <b>1909</b> |             |             |
| GBM                 | 3513             | 30871        |             |             |             |
| GBM                 | 3747             | 36070        |             |             |             |
| GBM                 | 2655             | 20061        |             |             |             |
| GBM                 | 3527             | 21366        |             |             |             |
| GBM                 | 2643             | 17833        |             |             |             |
| GBM                 | 3555             | 18439        | <b>2160</b> |             |             |
| <b>normal brain</b> | <b>frontal</b>   | <b>17581</b> |             |             |             |
| <b>normal brain</b> | <b>occipital</b> | <b>14549</b> |             |             |             |
| <b>normal brain</b> | <b>parietal</b>  |              |             |             | <b>1864</b> |
| <b>normal brain</b> | <b>temporal</b>  | <b>24982</b> |             |             |             |
| OAI                 | 1418             | 26306        |             |             |             |
| pGBM                | 820              | 38785        |             |             |             |
| pGBM                | 176              | 24154        |             |             |             |
| sek GBM             | 677              | 18769        |             | <b>3412</b> |             |
| sek GBM             | 1214             | 24461        |             |             |             |
| sek GBM             | 1329             | 39085        |             |             |             |
| sek GBM             | 1430             | 24163        |             |             |             |
| sek GBM             | 1944             | 16999        |             |             |             |
| sek GBM             | 2007             | 43109        |             |             |             |
| sek GBM             | 2727             | 20646        |             |             |             |
| sek GBM             | 3475             | 17974        |             |             |             |
| GBM cells           | A172             | 38776        |             |             |             |
| GBM cells           | LN229            | 20089        |             |             |             |
| GBM cells           | LN428            | 27441        |             |             |             |
| GBM cells           | T98G             | 23426        |             |             |             |
| GBM cells           | U178             | 48217        |             |             |             |

*Splice isoforms present in normal brain tissue are marked by bold font.*

*Splice isoforms more abundant in glioma tissue and reduced or lacking in normal brain tissues are marked by italics bold font.*

## B

The RT-PCR products of specific splice isoforms of the *CPEB2* gene:

| Detected alternative splice isoforms: |             |        | 2d     | 2d*          | 2c          | 2c*    | 2b     | 2a          |        |
|---------------------------------------|-------------|--------|--------|--------------|-------------|--------|--------|-------------|--------|
| Diagnose                              | ID/T-Nummer | 170 bp | 203 bp | 262 bp       | 271 bp      | 286 bp | 294 bp | 351 bp      | 375 bp |
| AAIII                                 | 2377        |        |        | <b>19243</b> | <b>3816</b> | 21200  |        | <b>7022</b> | 8456   |
| AAIII                                 | 2526        |        |        | <b>15307</b> |             | 28051  | 4055   |             | 4453   |
| AAIII                                 | 2725        |        |        | <b>13604</b> | <b>2454</b> | 17950  | 2852   | <b>3193</b> | 4612   |
| AAIII                                 | 2744        |        |        | <b>7681</b>  |             | 12972  |        |             | 4560   |
| AAIII                                 | 2771        |        |        | <b>8959</b>  | <b>1071</b> | 13648  | 1525   | <b>1776</b> | 2961   |
| AAIII                                 | 2897        |        |        | <b>9514</b>  |             | 34779  | 4853   | <b>2798</b> | 16075  |
| AAIII                                 | 2899        |        |        | <b>5384</b>  |             | 24686  | 4201   |             | 8263   |
| AAIII                                 | 3423        |        |        | <b>9284</b>  |             | 23739  | 2808   |             | 6835   |
| AAIII                                 | 3545        |        |        | <b>19103</b> |             | 31827  | 3676   | <b>4930</b> | 10797  |
| AAIII                                 | 3546        |        |        | <b>9080</b>  |             | 34540  | 6921   |             | 7906   |
| AAIII                                 | 3548        |        |        | <b>12417</b> |             | 23140  | 2490   | <b>3353</b> | 7882   |
| AAIII                                 | 4045        |        |        | <b>3934</b>  |             | 57221  | 4731   |             | 9744   |

|                     |                  |     |     |              |             |              |             |              |              |
|---------------------|------------------|-----|-----|--------------|-------------|--------------|-------------|--------------|--------------|
| GBM                 | 71               |     |     | <b>15391</b> | <b>2816</b> | 5999         |             | <b>1907</b>  |              |
| GBM                 | 72               |     |     | <b>23004</b> | <b>3795</b> | 11148        |             | <b>5366</b>  |              |
| GBM                 | 132              |     |     | <b>8845</b>  |             | 9613         |             | <b>1354</b>  |              |
| GBM                 | 172              |     |     | <b>16565</b> |             | 15177        |             |              | 5853         |
| GBM                 | 327              |     |     | <b>19305</b> |             | 5559         |             | <b>2000</b>  |              |
| GBM                 | 328              |     |     | <b>27750</b> |             | 20949        |             |              | 6870         |
| GBM                 | 625              |     |     | <b>28744</b> | <b>3612</b> | 10825        |             | <b>7319</b>  | 3753         |
| GBM                 | 862              |     |     | <b>17776</b> | <b>2447</b> | 6002         |             | <b>1722</b>  |              |
| GBM                 | 1010             |     |     | <b>15453</b> | <b>2242</b> | 9012         | 1193        | <b>3549</b>  | 2778         |
| GBM                 | 1311             |     |     | <b>39092</b> | <b>4376</b> | 12895        |             | <b>5148</b>  |              |
| GBM                 | 1619             |     |     | <b>20667</b> |             | 14643        |             |              |              |
| GBM                 | 1968             |     |     | <b>22959</b> |             | 18904        |             | <b>6162</b>  |              |
| GBM                 | 2010             |     |     | <b>21862</b> | <b>2844</b> | 16371        | 2312        | <b>7560</b>  | 7230         |
| GBM                 | 2104             |     |     | <b>20673</b> | <b>2917</b> | 32529        | 4586        |              | 4254         |
| GBM                 | 2169             |     |     | <b>33190</b> | <b>4799</b> | 10029        |             | <b>4174</b>  |              |
| GBM                 | 2304             |     |     | <b>20938</b> | <b>3913</b> | 8495         |             | <b>2218</b>  |              |
| GBM                 | 2481             |     |     | <b>21328</b> |             | 23116        |             |              | 6976         |
| GBM                 | 2486             |     |     | <b>23707</b> |             | 19784        | 3520        |              |              |
| GBM                 | 2494             |     |     | <b>10869</b> |             | 12771        |             | <b>2577</b>  | 3845         |
| GBM                 | 2735             |     |     | <b>30423</b> | <b>5149</b> | 16458        |             | <b>11587</b> | 8431         |
| GBM                 | 2757             |     |     | <b>20331</b> | <b>3224</b> | 11469        |             | <b>5863</b>  | 3850         |
| GBM                 | 2854             |     |     | <b>16473</b> | <b>3507</b> | 31545        | 6160        |              | 4135         |
| GBM                 | 2884             |     |     | <b>22520</b> | <b>3867</b> | 11169        |             | <b>3910</b>  | 2412         |
| GBM                 | 2896             |     |     | <b>18772</b> | <b>3692</b> | 21197        |             |              | 5594         |
| GBM                 | 3007             |     |     | <b>35081</b> | <b>6034</b> | 25479        | 4176        | <b>7502</b>  | 7393         |
| GBM                 | 3031             | 422 | 567 |              |             |              |             |              |              |
| GBM                 | 3032             |     |     | <b>23106</b> | <b>4075</b> | 21910        | 3737        | <b>5109</b>  | 5755         |
| GBM                 | 3066             |     |     | <b>7374</b>  |             | 4665         |             | <b>966</b>   |              |
| GBM                 | 3070             |     |     | <b>11779</b> |             | 9861         |             |              |              |
| GBM                 | 3513             |     |     | <b>15812</b> | <b>2648</b> | 13211        | 1889        | <b>3364</b>  | 3997         |
| GBM                 | 3747             |     |     | <b>3935</b>  |             | 35837        | 4589        |              | 9197         |
| GBM                 | 2655             |     |     | <b>5707</b>  |             | 16105        | 3979        |              |              |
| GBM                 | 3527             |     |     | <b>19454</b> | <b>3971</b> | 16649        | 3240        | <b>2610</b>  | 2390         |
| GBM                 | 2643             |     |     | <b>15336</b> |             | 9016         |             |              |              |
| GBM                 | 3555             |     |     | <b>15783</b> | <b>1412</b> | 8804         |             | <b>4047</b>  | 2729         |
| <b>normal brain</b> | <b>frontal</b>   |     |     |              |             | <b>19221</b> | <b>2402</b> |              | <b>9947</b>  |
| <b>normal brain</b> | <b>occipital</b> |     |     |              |             | <b>17043</b> | <b>2654</b> |              | <b>8193</b>  |
| <b>normal brain</b> | <b>parietal</b>  |     |     |              |             | <b>27201</b> | <b>3259</b> |              | <b>15137</b> |
| <b>normal brain</b> | <b>temporal</b>  |     |     |              |             | <b>9943</b>  |             |              | <b>5267</b>  |
| OAI                 | 1418             |     |     | <b>10382</b> |             | 27422        | 3413        |              | 9416         |
| pGBM                | 820              |     |     | <b>18678</b> |             | 17925        |             |              |              |
| pGBM                | 176              |     |     | <b>13646</b> |             | 6486         |             |              |              |
| sek GBM             | 677              |     |     | <b>22717</b> | <b>4536</b> | 16365        |             | <b>6843</b>  | 5106         |



|           |       |  |  |                     |                    |       |      |                    |      |
|-----------|-------|--|--|---------------------|--------------------|-------|------|--------------------|------|
| sek GBM   | 1214  |  |  | <b><i>14151</i></b> |                    | 22018 |      |                    |      |
| sek GBM   | 1329  |  |  | <b><i>25454</i></b> | <b><i>4341</i></b> | 13992 | 2448 | <b><i>3946</i></b> | 3066 |
| sek GBM   | 1430  |  |  | <b><i>8732</i></b>  |                    | 13920 |      |                    | 2573 |
| sek GBM   | 1944  |  |  | <b><i>2784</i></b>  |                    | 1408  |      |                    |      |
| sek GBM   | 2007  |  |  | <b><i>25122</i></b> |                    | 13291 |      | <b><i>5809</i></b> | 4136 |
| sek GBM   | 2727  |  |  | <b><i>13130</i></b> |                    | 13388 | 2144 |                    |      |
| sek GBM   | 3475  |  |  | <b><i>9065</i></b>  |                    | 25518 | 4897 |                    | 6035 |
| GBM cells | A172  |  |  | <b><i>31735</i></b> | <b><i>3767</i></b> | 4119  |      | <b><i>3787</i></b> |      |
| GBM cells | LN229 |  |  | <b><i>22869</i></b> | <b><i>5466</i></b> | 1544  |      | <b><i>2998</i></b> |      |
| GBM cells | LN428 |  |  | <b><i>32980</i></b> | <b><i>3384</i></b> | 8621  |      |                    |      |
| GBM cells | T98G  |  |  | <b><i>43905</i></b> |                    |       |      | <b><i>3575</i></b> |      |
| GBM cells | U178  |  |  | <b><i>48671</i></b> |                    |       |      |                    |      |

Splice isoforms present in normal brain tissue are marked by bold font.

Splice isoforms more abundant in glioma tissue and reduced or lacking in normal brain tissues are marked by italics bold font.

## C

### The RT-PCR products of specific splice isoforms of the *CPEB3* gene:

| Diagnose | ID/T-<br>Number | Detected alternative splice isoforms: |           |                    |           |           |           |           |           |           |           |           |           |                    | 3d        | 3c        | 3b        | 3a        |           |
|----------|-----------------|---------------------------------------|-----------|--------------------|-----------|-----------|-----------|-----------|-----------|-----------|-----------|-----------|-----------|--------------------|-----------|-----------|-----------|-----------|-----------|
|          |                 | 100<br>bp                             | 104<br>bp | 122<br>bp          | 135<br>bp | 143<br>bp | 182<br>bp | 203<br>bp | 254<br>bp | 306<br>bp | 339<br>bp | 416<br>bp | 437<br>bp | 452<br>bp          | 507<br>bp | 531<br>bp | 547<br>bp | 576<br>bp | 600<br>bp |
| AAIII    | 2377            |                                       |           |                    |           |           |           |           |           |           |           |           |           |                    | 14978     |           |           | 7471      |           |
| AAIII    | 2526            |                                       |           |                    |           |           |           |           |           |           |           |           |           |                    | 16481     |           |           | 5174      |           |
| AAIII    | 2725            |                                       |           |                    |           |           |           |           |           |           |           |           |           |                    | 8565      |           |           | 5827      |           |
| AAIII    | 2744            |                                       |           |                    |           |           |           |           | 1336      |           |           |           |           |                    | 8779      |           |           | 3911      |           |
| AAIII    | 2771            |                                       |           |                    |           |           |           |           |           | 2691      |           |           |           |                    | 11567     |           |           |           |           |
| AAIII    | 2897            |                                       |           |                    |           |           |           |           |           |           |           |           |           |                    | 10303     | 3297      |           | 7329      | 6800      |
| AAIII    | 2899            |                                       |           |                    |           |           |           |           |           |           |           |           |           |                    | 9728      |           |           | 5401      | 1662      |
| AAIII    | 3423            |                                       |           |                    |           |           |           |           |           |           |           |           |           |                    | 8332      |           |           | 7130      | 3319      |
| AAIII    | 3545            |                                       |           |                    |           |           |           |           |           |           |           |           |           |                    | 10263     | 1937      |           | 6631      | 5312      |
| AAIII    | 3546            |                                       |           |                    |           |           |           |           |           |           |           |           |           |                    | 10090     |           |           | 7658      |           |
| AAIII    | 3548            |                                       |           | <b><i>2244</i></b> |           | 950       |           |           |           |           |           |           |           |                    | 14927     |           |           | 5418      | 1641      |
| AAIII    | 4045            |                                       |           |                    |           | 2809      |           | 967       | 1267      |           |           |           |           |                    | 6986      |           |           |           |           |
| GBM      | 71              |                                       |           | 975                |           |           |           |           |           |           |           |           |           |                    | 2644      |           |           |           |           |
| GBM      | 72              |                                       |           |                    | 890       |           |           |           |           |           |           |           |           |                    | 12224     |           |           | 3767      |           |
| GBM      | 132             |                                       |           |                    |           |           |           |           |           |           |           |           |           |                    | 2960      |           |           |           |           |
| GBM      | 172             |                                       |           |                    |           |           |           |           |           |           | 2041      | 1151      |           |                    |           |           |           | 5473      |           |
| GBM      | 327             |                                       |           |                    |           |           |           |           |           |           |           |           |           | <b><i>4332</i></b> |           |           |           |           |           |
| GBM      | 328             |                                       |           |                    |           |           |           |           |           |           |           |           |           |                    | 11773     |           |           | 3715      |           |
| GBM      | 625             |                                       |           | <b><i>3411</i></b> |           |           |           | 1331      |           |           |           |           |           |                    | 9924      |           |           | 4181      |           |
| GBM      | 862             |                                       |           | 2902               |           |           |           |           |           |           |           |           |           |                    | 4307      |           |           |           |           |
| GBM      | 1010            | 2482                                  |           |                    |           |           |           |           |           |           |           |           |           |                    | 3189      |           |           | 3926      |           |
| GBM      | 1311            |                                       |           | 1697               |           |           |           |           |           |           |           |           |           |                    | 5664      |           |           | 4930      |           |
| GBM      | 1619            |                                       |           |                    |           |           |           |           |           |           |           |           |           |                    | 8481      |           |           | 2164      |           |
| GBM      | 1968            |                                       |           |                    |           |           |           | 1309      |           |           |           |           |           |                    | 12571     |           |           | 3929      |           |
| GBM      | 2010            |                                       |           | 1832               |           |           |           |           |           |           |           |           |           |                    | 11890     |           | 4069      | 5785      |           |
| GBM      | 2104            |                                       |           | 1684               |           |           |           |           |           |           |           |           |           |                    | 9475      |           |           | 5370      |           |
| GBM      | 2169            | 2010                                  |           | <b><i>2775</i></b> |           |           |           | 2038      | 1369      |           |           |           |           |                    | 7456      |           |           |           |           |

|                     |                  |             |      |              |      |  |  |      |      |  |  |      |  |             |             |             |  |             |             |
|---------------------|------------------|-------------|------|--------------|------|--|--|------|------|--|--|------|--|-------------|-------------|-------------|--|-------------|-------------|
| GBM                 | 2304             |             |      | <b>3064</b>  |      |  |  |      |      |  |  |      |  |             | 6016        |             |  | 5035        |             |
| GBM                 | 2481             |             |      |              |      |  |  |      |      |  |  |      |  |             | 4655        |             |  | 1948        |             |
| GBM                 | 2486             |             |      |              |      |  |  |      |      |  |  |      |  |             | 13216       |             |  | 5885        |             |
| GBM                 | 2494             |             |      |              |      |  |  |      |      |  |  |      |  |             | 7194        |             |  | 4258        |             |
| GBM                 | 2735             |             |      | <b>3702</b>  |      |  |  |      |      |  |  |      |  |             | 19438       |             |  | 6404        |             |
| GBM                 | 2757             |             |      |              |      |  |  |      |      |  |  |      |  |             | 7269        |             |  | 3233        |             |
| GBM                 | 2854             |             |      | <b>2848</b>  |      |  |  |      |      |  |  |      |  |             | 11950       |             |  | 4230        |             |
| GBM                 | 2884             |             |      | 906          |      |  |  |      |      |  |  |      |  | <b>2270</b> | 3166        |             |  |             |             |
| GBM                 | 2896             |             |      |              |      |  |  |      |      |  |  |      |  |             | 8291        |             |  | 3573        |             |
| GBM                 | 3007             |             |      | <b>3215</b>  |      |  |  |      | 1769 |  |  |      |  |             | 12083       | 2690        |  | 8418        | 4942        |
| GBM                 | 3031             |             |      |              |      |  |  |      | 1302 |  |  |      |  | 1394        | 13680       | 2416        |  | 5531        |             |
| GBM                 | 3032             |             |      |              | 1488 |  |  |      | 1435 |  |  |      |  |             | 11285       |             |  | 5442        |             |
| GBM                 | 3066             |             |      | 937          |      |  |  |      |      |  |  |      |  |             | 5000        |             |  |             |             |
| GBM                 | 3070             |             |      | <b>2843</b>  |      |  |  |      |      |  |  | 1775 |  |             | 2916        |             |  |             |             |
| GBM                 | 3513             |             |      |              | 1274 |  |  |      | 958  |  |  |      |  |             | 7020        |             |  | 5493        |             |
| GBM                 | 3747             |             |      |              |      |  |  |      | 1060 |  |  |      |  |             | 13025       |             |  | 5380        |             |
| GBM                 | 2655             |             |      |              |      |  |  |      |      |  |  |      |  |             | 6427        |             |  | 5669        |             |
| GBM                 | 3527             |             |      |              |      |  |  |      |      |  |  |      |  |             | 14338       |             |  | 8036        |             |
| GBM                 | 2643             |             |      |              | 1052 |  |  |      |      |  |  |      |  |             | 2988        |             |  |             |             |
| GBM                 | 3555             |             |      |              |      |  |  | 1790 |      |  |  |      |  |             | 7409        |             |  | 4267        |             |
| <b>normal brain</b> | <b>frontal</b>   |             |      |              |      |  |  |      |      |  |  |      |  |             | <b>2786</b> |             |  | <b>3347</b> | <b>6109</b> |
| <b>normal brain</b> | <b>occipital</b> |             |      |              |      |  |  |      |      |  |  |      |  |             | <b>2747</b> | <b>1313</b> |  | <b>3014</b> | <b>4169</b> |
| <b>normal brain</b> | <b>parietal</b>  |             |      |              |      |  |  |      |      |  |  |      |  |             | <b>2224</b> |             |  | <b>4410</b> | <b>8886</b> |
| <b>normal brain</b> | <b>temporal</b>  |             |      |              |      |  |  |      |      |  |  |      |  |             | <b>2423</b> |             |  |             | <b>4662</b> |
| OAI                 | 1418             |             |      |              |      |  |  |      |      |  |  |      |  |             | 10694       |             |  | 3442        |             |
| pGBM                | 820              |             |      |              | 781  |  |  |      |      |  |  |      |  |             | 14046       |             |  | 9726        |             |
| pGBM                | 176              |             |      |              |      |  |  |      |      |  |  |      |  |             | 1821        |             |  | 994         |             |
| sek GBM             | 677              |             |      | 1794         |      |  |  |      |      |  |  |      |  |             | 16129       |             |  | 5345        |             |
| sek GBM             | 1214             |             |      |              |      |  |  |      |      |  |  |      |  |             | 10861       |             |  | 4527        |             |
| sek GBM             | 1329             |             |      |              |      |  |  |      |      |  |  |      |  |             | 5077        |             |  | 3081        |             |
| sek GBM             | 1430             |             |      |              |      |  |  |      |      |  |  |      |  |             | 2564        |             |  | 1991        |             |
| sek GBM             | 1944             |             |      |              |      |  |  |      |      |  |  |      |  |             |             |             |  |             |             |
| sek GBM             | 2007             |             |      | 1156         |      |  |  |      |      |  |  |      |  |             | 12615       |             |  | 5049        |             |
| sek GBM             | 2727             |             |      |              |      |  |  |      |      |  |  |      |  |             | 3751        |             |  | 2626        |             |
| sek GBM             | 3475             |             |      |              |      |  |  |      |      |  |  |      |  |             | 12062       |             |  | 4703        |             |
| GBM cells           | A172             | <b>4055</b> |      | 4301         |      |  |  |      |      |  |  |      |  |             | 8985        |             |  | 4284        |             |
| GBM cells           | LN229            |             |      |              |      |  |  |      |      |  |  |      |  |             | 2498        |             |  | 2219        |             |
| GBM cells           | LN428            |             |      |              |      |  |  |      |      |  |  |      |  |             | 8673        |             |  | 5298        |             |
| GBM cells           | T98G             | 1685        |      | 1524         |      |  |  |      |      |  |  |      |  |             |             |             |  |             |             |
| GBM cells           | U178             | <b>9331</b> | 1442 | <b>10162</b> |      |  |  | 1469 |      |  |  |      |  |             | 9216        |             |  | 3498        |             |

Splice isoforms present in normal brain tissue are marked by bold font

Splice isoforms more abundant in glioma tissue and reduced or lacking in normal brain tissues are marked by italics bold font

**D**

**The RT-PCR products of specific splice isoforms of the *CPEB4* gene:**

| <b>Detected alternative splice isoforms:</b> |                         |               |               |               |               |               |               |               |               |               |               |
|----------------------------------------------|-------------------------|---------------|---------------|---------------|---------------|---------------|---------------|---------------|---------------|---------------|---------------|
|                                              |                         | <b>4d</b>     |               |               | <b>4c</b>     | <b>4b</b>     |               | <b>4a</b>     |               |               |               |
| <b>Diagnose</b>                              | <b>ID/T-<br/>Number</b> | <b>115 bp</b> | <b>142 bp</b> | <b>182 bp</b> | <b>203 bp</b> | <b>226 bp</b> | <b>254 bp</b> | <b>277 bp</b> | <b>306 bp</b> | <b>507 bp</b> | <b>547 bp</b> |
| AAIII                                        | 2377                    |               |               |               | 21149         |               | 21655         |               |               |               |               |
| AAIII                                        | 2526                    |               |               |               | 19619         |               | 19174         |               |               | 1675          |               |
| AAIII                                        | 2725                    |               |               |               | 26046         |               | 20165         |               |               |               |               |
| AAIII                                        | 2744                    |               |               |               | 21718         |               | 25345         |               |               |               |               |
| AAIII                                        | 2771                    |               |               |               | 16637         |               | 12207         |               | 7133          |               |               |
| AAIII                                        | 2897                    |               |               |               | 26150         | 5221          | 22566         | 4984          |               |               |               |
| AAIII                                        | 2899                    |               |               |               | 19046         | 1503          | 15869         | 1628          |               |               |               |
| AAIII                                        | 3423                    |               |               |               | 9538          |               | 8597          | 1103          |               |               |               |
| AAIII                                        | 3545                    |               |               |               | 19463         |               | 25298         |               |               |               |               |
| AAIII                                        | 3546                    |               |               |               | 22665         |               | 20903         |               |               |               |               |
| AAIII                                        | 3548                    |               |               |               | 21383         |               | 22958         | 2407          |               | 2125          |               |
| AAIII                                        | 4045                    |               |               |               | 26882         |               | 32885         | 2864          |               |               |               |
| GBM                                          | 71                      |               |               |               | 7320          |               | 4185          |               |               |               |               |
| GBM                                          | 72                      |               |               |               | 15172         |               | 15587         |               |               |               |               |
| GBM                                          | 132                     |               |               |               | 6518          |               | 5536          |               |               |               |               |
| GBM                                          | 172                     |               |               |               | 17460         | 4028          | 9620          | 6182          |               |               |               |
| GBM                                          | 327                     |               |               |               | 12086         |               | 8460          |               |               |               |               |
| GBM                                          | 328                     |               |               |               | 25485         |               | 21644         |               |               |               |               |
| GBM                                          | 625                     |               |               | 2634          | 30452         |               | 11702         |               |               |               |               |
| GBM                                          | 862                     |               | 3500          |               | 15071         |               | 5445          |               |               |               |               |
| GBM                                          | 1010                    |               |               |               | 22305         |               | 14188         |               |               |               |               |
| GBM                                          | 1311                    |               |               |               | 22087         |               | 17696         |               |               |               |               |
| GBM                                          | 1619                    |               |               |               | 14804         |               | 15511         |               |               |               |               |
| GBM                                          | 1968                    |               |               |               | 33990         |               | 34922         |               |               |               |               |
| GBM                                          | 2010                    |               |               |               | 22114         |               | 21939         |               |               |               | <b>10977</b>  |
| GBM                                          | 2104                    |               |               |               | 20095         |               | 12555         | 2397          |               |               |               |
| GBM                                          | 2169                    |               |               |               | 49763         |               | 37272         |               |               |               |               |
| GBM                                          | 2304                    |               |               |               | 16788         |               | 13189         |               |               |               |               |
| GBM                                          | 2481                    |               |               |               | 14181         |               | 14563         |               |               |               |               |
| GBM                                          | 2486                    |               |               | 1526          | 25177         |               | 22191         |               |               | 1216          |               |
| GBM                                          | 2494                    |               |               |               | 13383         |               | 10394         | 2237          |               |               |               |
| GBM                                          | 2735                    |               |               |               | 22615         |               | 30332         |               |               | 2482          |               |
| GBM                                          | 2757                    |               |               |               | 13014         |               | 16528         |               |               |               |               |
| GBM                                          | 2854                    | 1810          |               |               | 27502         |               | 17757         |               |               |               |               |
| GBM                                          | 2884                    |               |               |               | 9538          |               | 11158         |               |               |               |               |
| GBM                                          | 2896                    |               |               |               | 21392         |               | 15304         | 2357          |               |               |               |
| GBM                                          | 3007                    |               |               |               | 40036         |               | 32132         |               |               |               |               |
| GBM                                          | 3031                    |               |               |               | 35312         |               | 23592         |               |               |               |               |
| GBM                                          | 3032                    |               |               |               | 37298         |               | 26434         |               |               |               |               |

|                     |                  |  |  |      |              |              |              |              |      |  |
|---------------------|------------------|--|--|------|--------------|--------------|--------------|--------------|------|--|
| GBM                 | 3066             |  |  |      | 8825         |              | 7801         |              |      |  |
| GBM                 | 3070             |  |  |      | 9167         |              | 6748         |              |      |  |
| GBM                 | 3513             |  |  |      | 21270        | 2580         | 19710        | 3011         |      |  |
| GBM                 | 3747             |  |  |      | 21631        |              | 25574        |              |      |  |
| GBM                 | 2655             |  |  |      | 11793        |              | 9233         | 2176         |      |  |
| GBM                 | 3527             |  |  |      | 22106        |              | 22278        |              |      |  |
| GBM                 | 2643             |  |  |      | 18032        |              | 12070        |              |      |  |
| GBM                 | 3555             |  |  | 4261 | 11334        |              | 9271         | 5636         |      |  |
| <b>normal brain</b> | <b>frontal</b>   |  |  |      | <b>9860</b>  | <b>6940</b>  | <b>6026</b>  | <b>6231</b>  |      |  |
| <b>normal brain</b> | <b>occipital</b> |  |  |      | <b>8343</b>  | <b>8381</b>  | <b>5602</b>  | <b>7068</b>  |      |  |
| <b>normal brain</b> | <b>parietal</b>  |  |  |      | <b>20994</b> | <b>14305</b> | <b>11481</b> | <b>10482</b> |      |  |
| <b>normal brain</b> | <b>temporal</b>  |  |  |      | <b>9343</b>  | <b>7008</b>  | <b>5371</b>  | <b>5927</b>  |      |  |
| OAI1                | 1418             |  |  |      | 19617        |              | 20652        |              |      |  |
| pGBM                | 820              |  |  |      | 20257        |              | 13442        |              | 1764 |  |
| pGBM                | 176              |  |  |      | 9898         |              | 5532         |              |      |  |
| sek GBM             | 677              |  |  |      | 17046        |              | 17065        |              | 1621 |  |
| sek GBM             | 1214             |  |  |      | 16456        | 2722         | 14162        | 2717         |      |  |
| sek GBM             | 1329             |  |  |      | 6742         |              | 4778         |              |      |  |
| sek GBM             | 1430             |  |  |      | 15947        | 2555         | 9824         | 2453         |      |  |
| sek GBM             | 1944             |  |  |      | 8971         |              | 3747         |              |      |  |
| sek GBM             | 2007             |  |  |      | 18669        |              | 15918        |              |      |  |
| sek GBM             | 2727             |  |  |      | 17089        |              | 10782        |              |      |  |
| sek GBM             | 3475             |  |  |      | 11656        |              | 16539        |              |      |  |
| GBM cells           | A172             |  |  |      | 20800        |              | 12084        |              |      |  |
| GBM cells           | LN229            |  |  |      | 14344        |              | 10688        |              |      |  |
| GBM cells           | LN428            |  |  |      | 15692        |              | 12416        |              |      |  |
| GBM cells           | T98G             |  |  |      | 27548        |              | 7879         |              |      |  |
| GBM cells           | U178             |  |  |      | 38061        |              | 17132        |              |      |  |

*Splice isoforms present in normal brain tissue are marked by bold font.*

*Splice isoforms more abundant in glioma tissue and reduced or lacking in normal brain tissues are marked by italics bold font.*

Fragment analysis of CPEB alternative splice isoforms in AAI1, pGBM, sGBMs, glioblastoma/medulloblastoma cell lines and normal brain tissue. The values above the table correspond to the RT-PCR product (size in basepairs) generated by fragment analysis.
